# Supplementary material for: Mutations of SARS-CoV-2 RBD May Alter Its Molecular Structure to Improve Its Infection Efficiency
Source: MDPI journal article supplement (doi:10.3390/biom11091273), 2021-08-25
Supplement: s1 [file s1]

Article

# Mutations of SARS-CoV-2 RBD may alter its molecular structure to improve its conformation

Ahmed L. Alaofi\* and Mudassar Shahid

Department of Pharmaceutics, College of Pharmacy, King Saud University, P.O. Box 2457, Riyadh 11451, Saudi Arabia

\* Correspondence: ahmedofi@ksu.edu.sa; Tel.: +966114677364; Fax: +966114676383

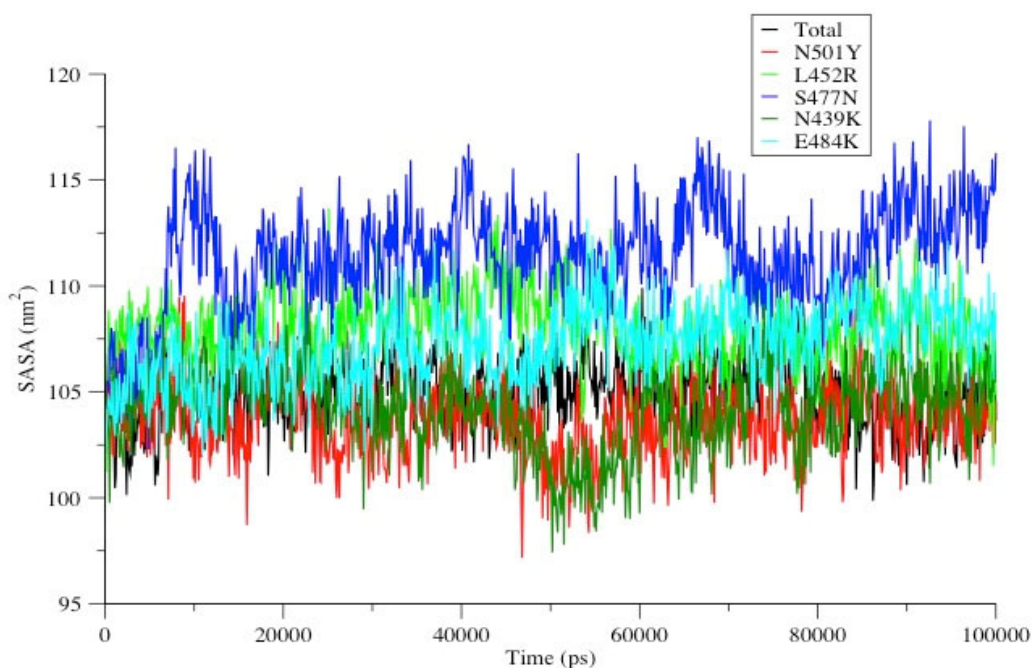

**Figure S1.** The solvent accessible surface area (SASA) was plotted against time (ps) for WT (black), ,N501Y (red), L452R (light green), S477N (blue), N439K (green), and E484K (cyan) RBDs.

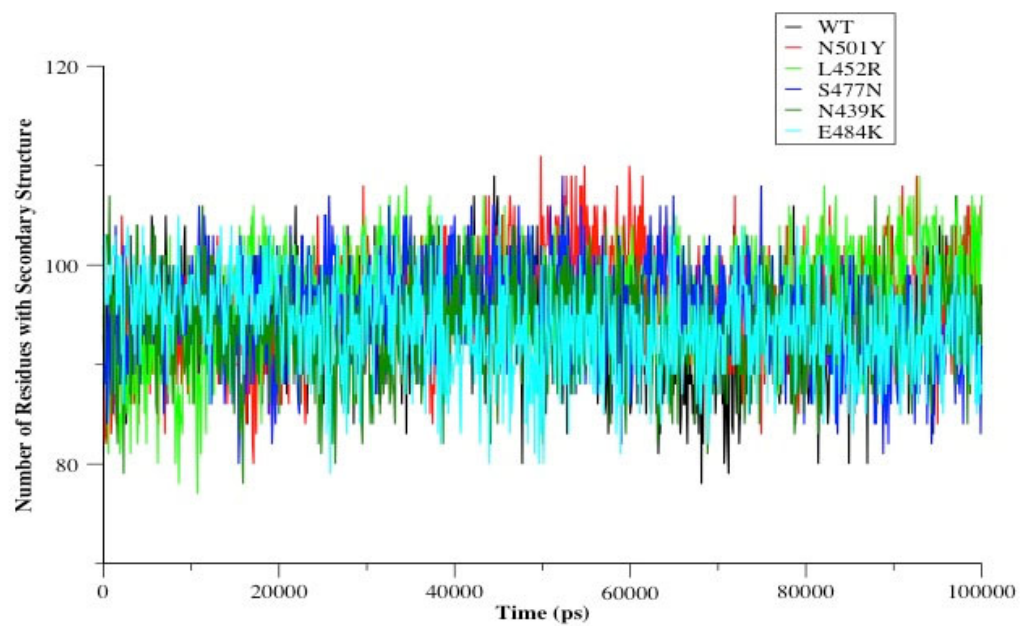

**Figure S2.** Number of secondary structure as a function of time (ps) for WT (black), N501Y (red), L452R (light green), S477N (blue), N439K (green), and E484K (cyan) RBDs during the 100-ns MD simulations.

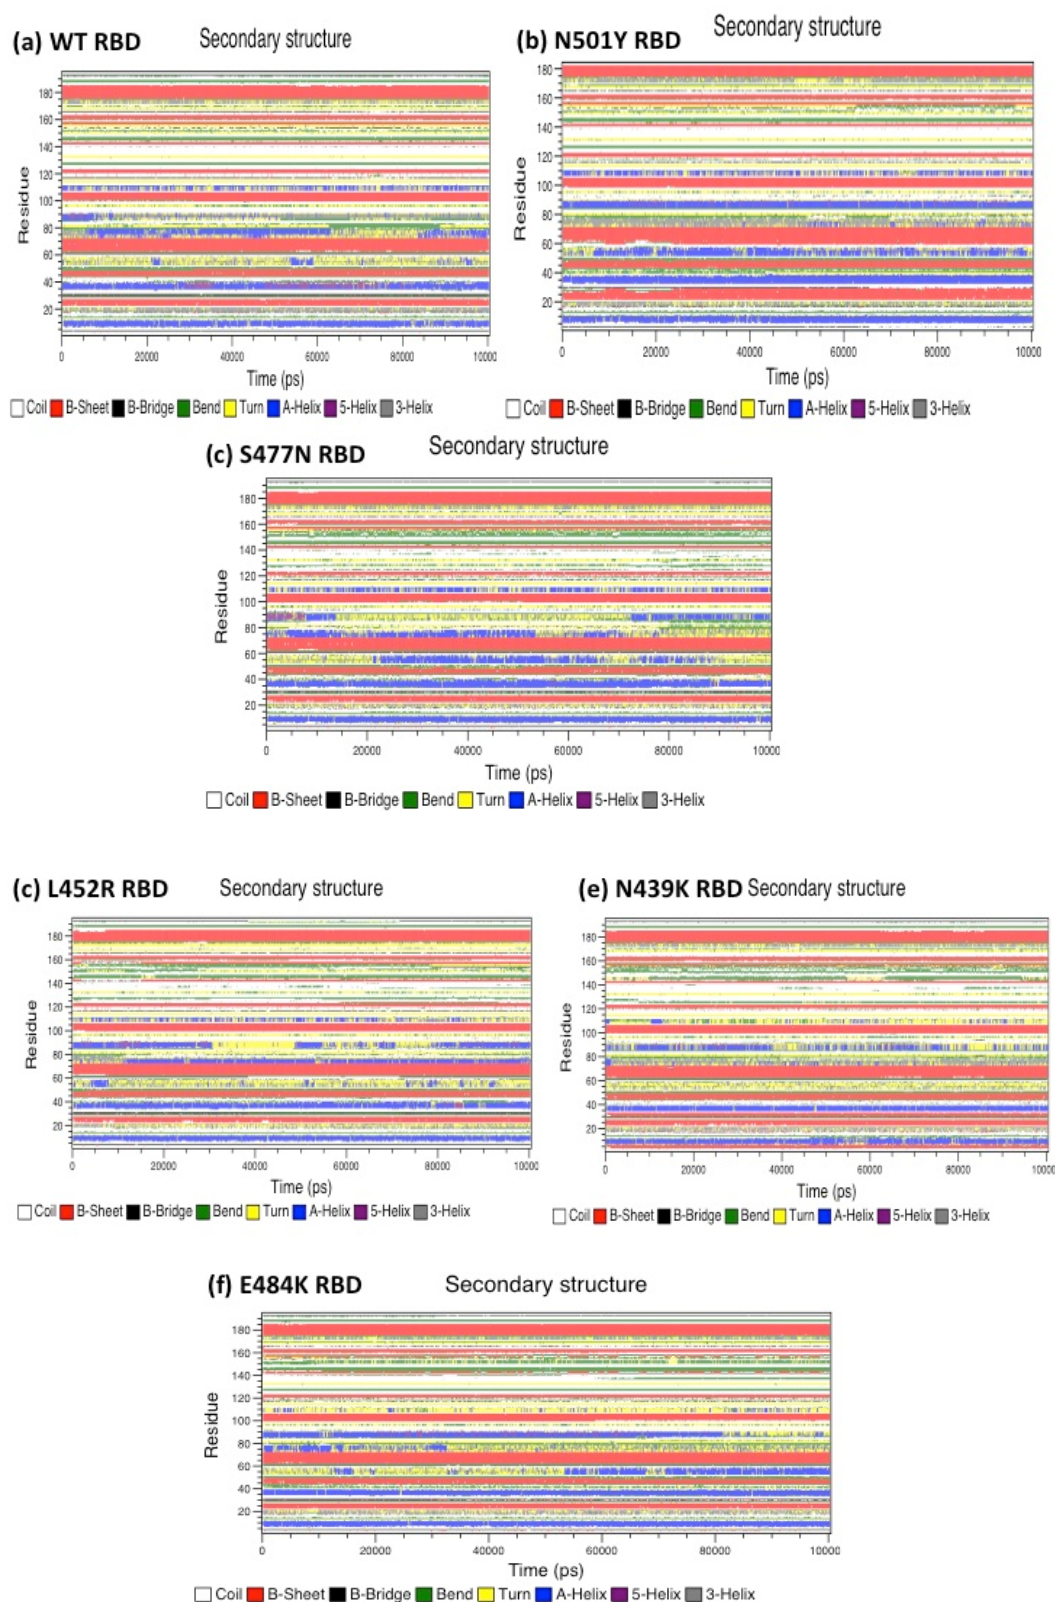

**Figure S3.** Dictionary of Protein Secondary Structure (DSSP) was used to monitor secondary structures changes during the 100-ns MD simulations for each system.

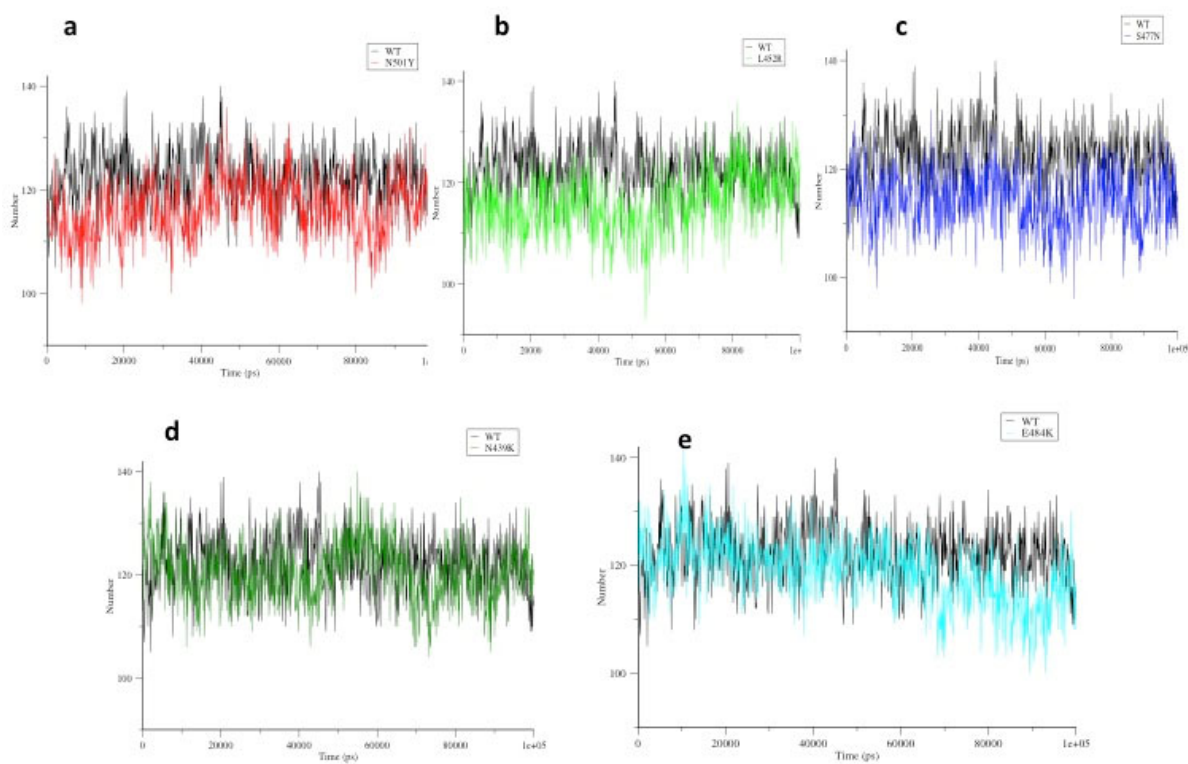

**Figure S4.** Number of hydrogen bonds was plotted as a function of time (ps). For comparison, number of H-bonds of WT RBD aligned with either N501Y (a), L452R (b), S477N (c), N439K (d), or E484K (e) RBDs.

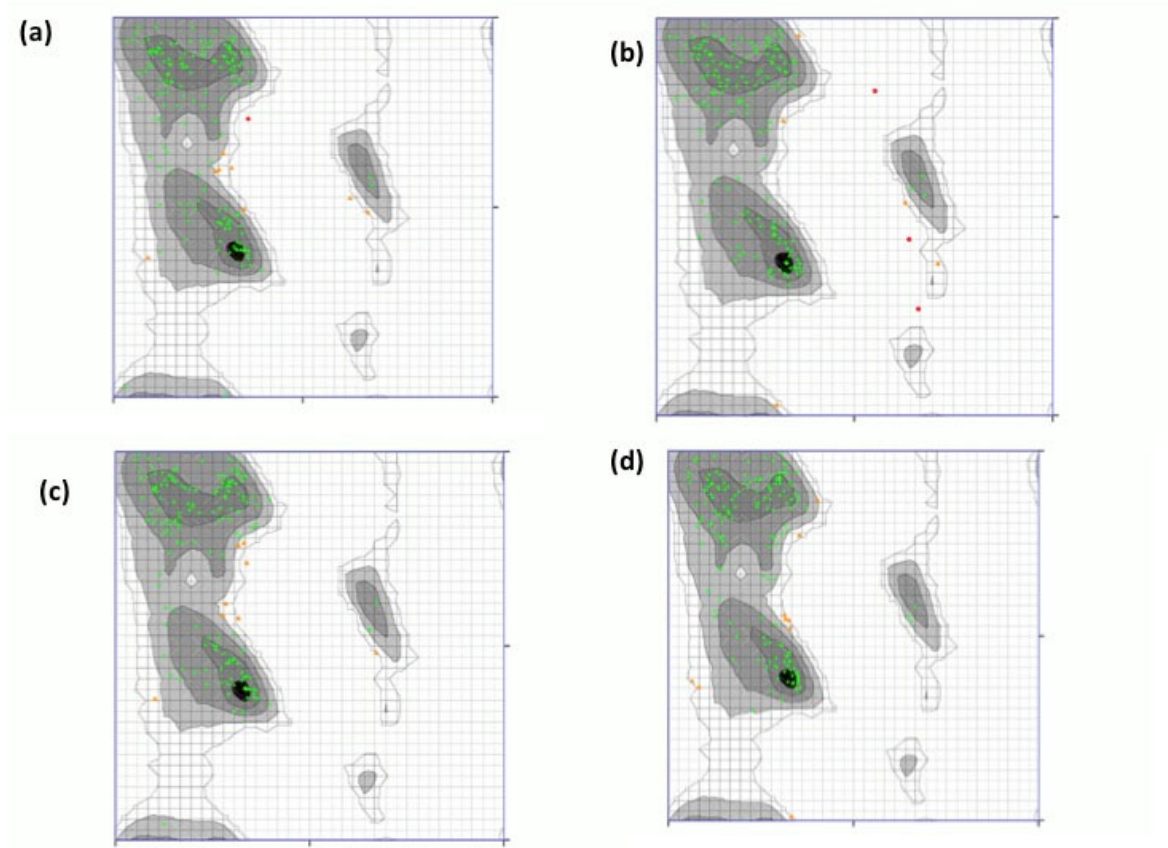

**Figure S5.** Ramachandran plot for modeled mutant RBDs L452R (a), S477N (b), N439K (c), and E484K (d) were obtained. The plot showed highly preferred observation more than 95% for all mutant RBDs.



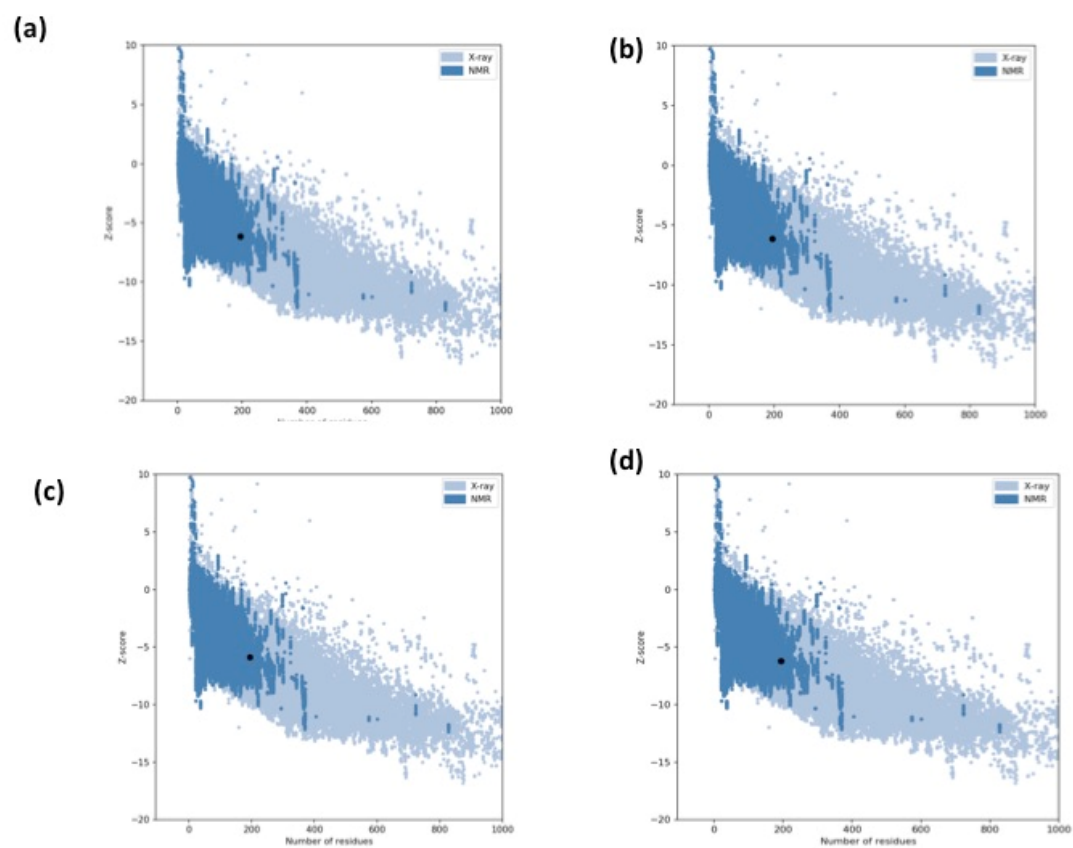

**Figure S6.** ProSA analysis showed z-score of -6.14, -6.13, -5.9, and -6.2 for L452R (a), S477N (b), N439K (c), and E484K (d) RBDs, respectively.

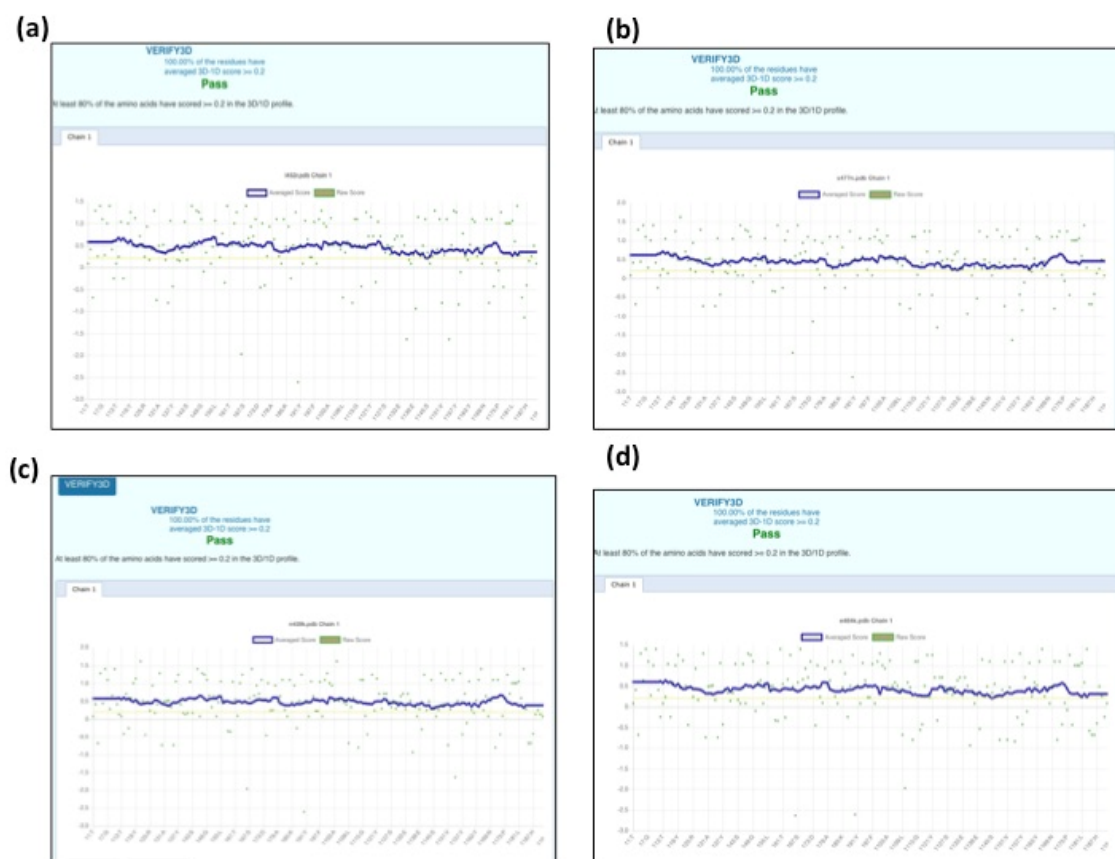

**Figure S7.** Verify3D was used to test the 3D structures for modeled mutant RBDs. All mutants RBDs passed the verification.
